# Supplementary material
Source: Royal Society of Chemistry journal article supplement (doi:10.1039/d5nr03812j)
Supplement: d5nr03812j1.pdf [file d5nr03812j1.pdf]

SUPPORTING INFORMATION

# Self-folding graphene scaffolds with integrated electronics for cardiac tissue engineering

*Alonso Ingar Romero,<sup>1,2,3,7</sup> Koji Sakai,<sup>3,4</sup> Toichiro Goto,<sup>3,4</sup> George Al Boustani,<sup>1,2,7</sup> Ryuya Kida,<sup>1,2,7</sup> Defne Tüzün,<sup>1,2,7</sup> Yuta Tanimura,<sup>2</sup> Ann-Caroline Heiler,<sup>5,6,7</sup> Joe Alexander,<sup>1</sup> Andreas R. Bausch,<sup>5,6,7</sup> Bernhard Wolfrum,<sup>1,2,7</sup> Tetsuhiko F. Teshima<sup>\*1,2,7,8</sup>*

## AUTHOR AFFILIATIONS

1 Medical & Health Informatics Laboratories, NTT Research Incorporated, Sunnyvale, CA,  
94085 USA

2 Neuroelectronics, Munich Institute of Biomedical Engineering, Department of Electrical  
Engineering, TUM School of Computation, Information and Technology, Technical University  
of Munich, Garching, Germany

3 Basic Research Laboratories, NTT, Inc., 3-1 Morinosato Wakamiya, Atsugi, Kanagawa 243-  
0198, Japan

4 NTT Bio-Medical Informatics Research Center, NTT, Inc., 3-1 Morinosato Wakamiya, Atsugi,  
Kanagawa 243-0198, Japan

5 Heinz Nixdorf Chair in Biophysical Engineering of Living Matter, Garching, Germany

6 Center for Functional Protein Assemblies (CPA), Technical University of Munich, Garching,  
Germany

7 Center for Organoid Systems (COS), Technical University of Munich, Garching, Germany

8 Department of Mechanical Engineering, Faculty of Science and Technology, Keio University,  
3-14-1 Hiyoshi, Kohoku-ku, Yokohama, 223-8522, Japan

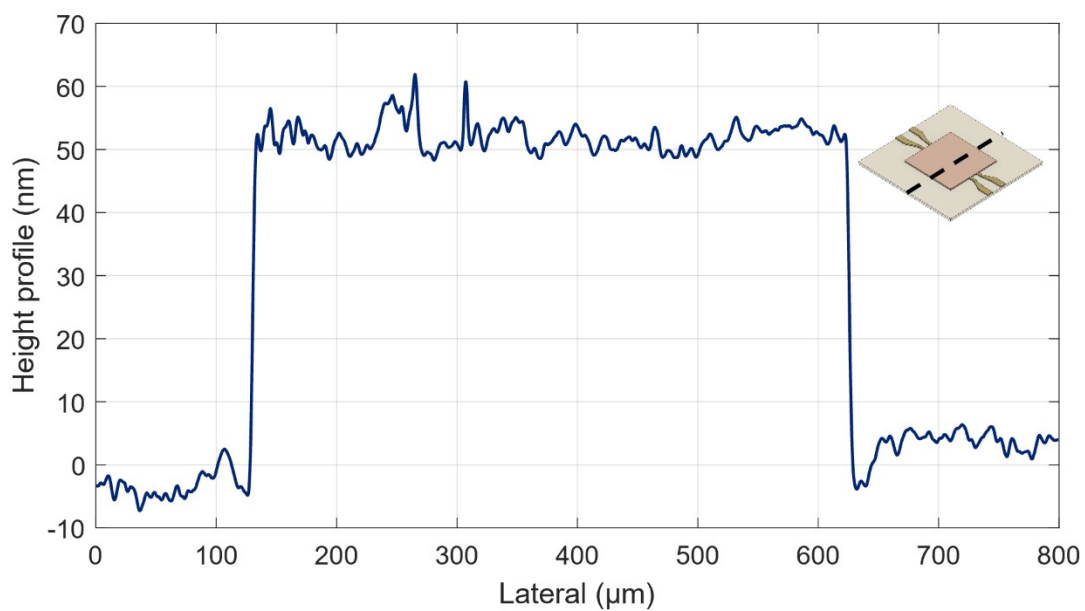

**Figure S1.** Profilometer measurement of the patterned Ca-alginate layer along the dashed line of the top-right schematic.

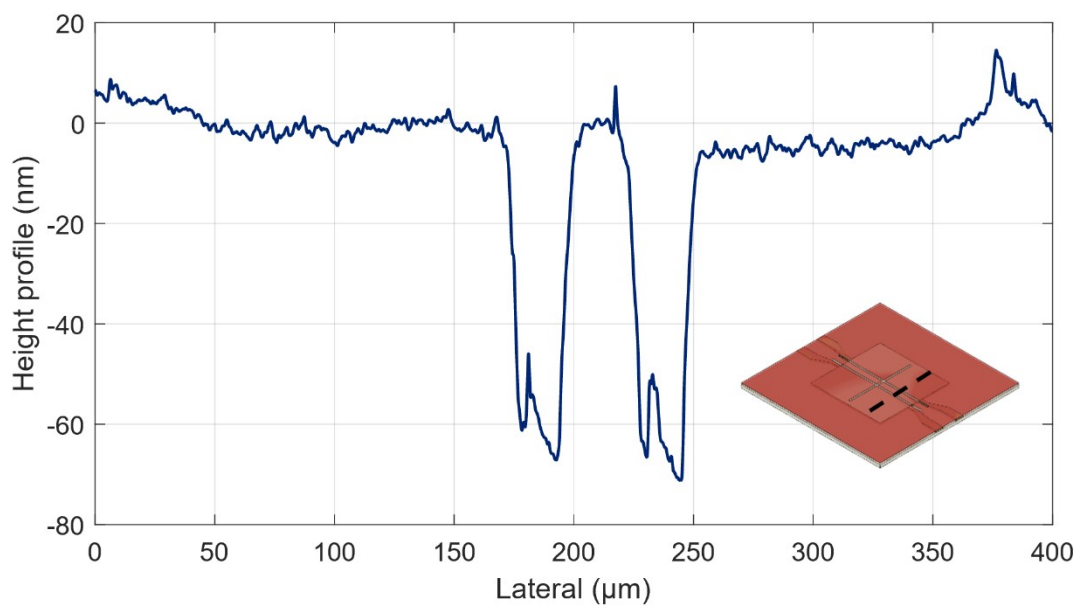

**Figure S2.** Profilometer measurement of the patterned graphene layer on top of Ca-alginate along the dashed line at the bottom-right schematic.

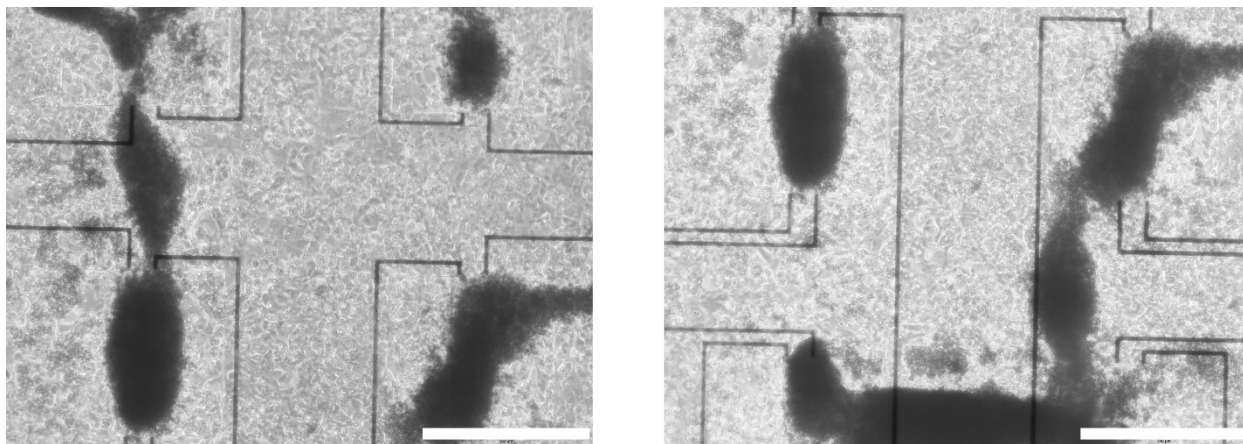

**Figure S3.** Cellular connections between different aggregates of primary cardiomyocytes around the graphene micro-rolls. Scale bar: 500  $\mu\text{m}$ .

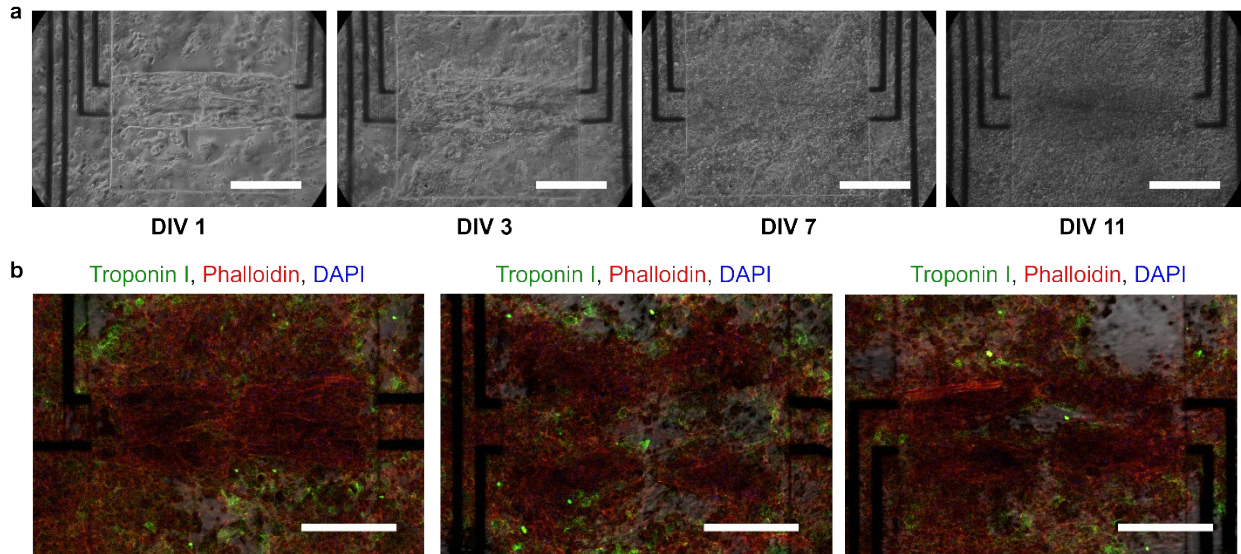

**Figure S4.** Long-term morphological and immunofluorescent characterisation of HL-1 cardiomyocytes cultured on graphene micro-roll scaffolds. (a) Time-lapse phase-contrast images showing the evolution of HL-1 cardiomyocyte cultures on graphene micro-rolls during the first 11 days. The images demonstrate stable cell attachment and progressive tissue coverage of the scaffold. (b) Immunofluorescence staining of HL-1 cardiomyocytes cultured on micro-rolls showing troponin I (green), phalloidin (actin cytoskeleton, red), and DAPI (nuclei, blue), confirming the presence of organised contractile structures within the cell network. Images were acquired from three representative micro-roll scaffolds at DIV 10. Scale bar: 200  $\mu\text{m}$ .

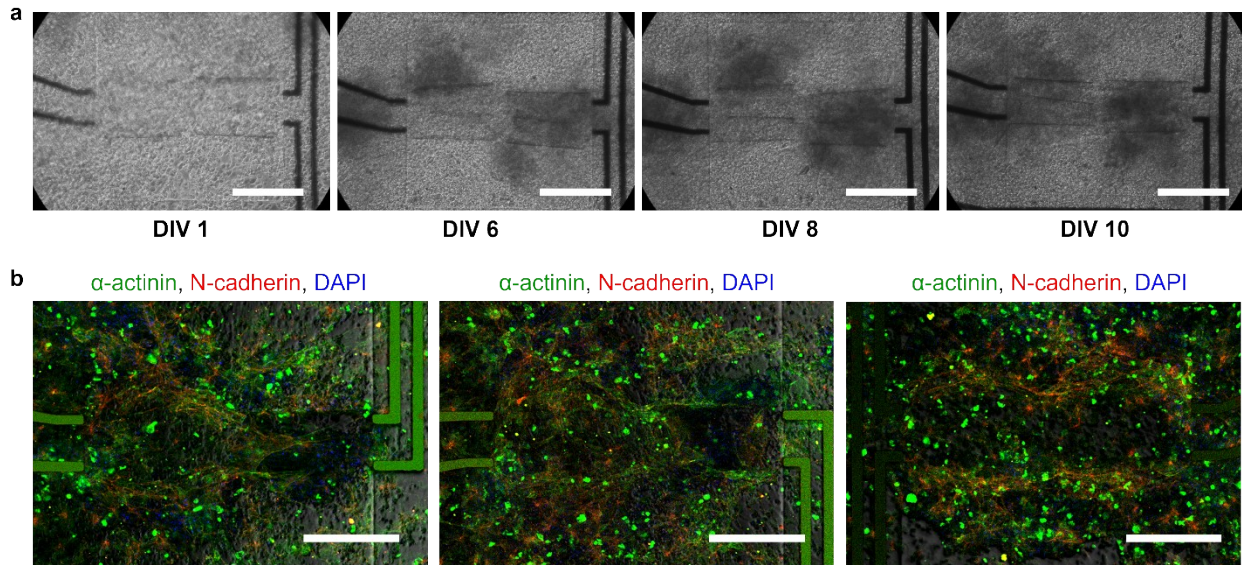

**Figure S5.** Long-term culture and structural characterisation of hiPSC-CMs on graphene micro-roll scaffolds. (a) Time-lapse phase-contrast images of hiPSC-CMs cultured on graphene micro-rolls during the first 10 days, demonstrating stable attachment and network formation on the scaffold surface. (b) Immunofluorescence staining of hiPSC-CMs showing  $\alpha$ -actinin (sarcomeric marker, green), N-cadherin (cell–cell junctions, red), and DAPI (nuclei, blue), illustrating the formation of cardiomyocyte networks and intercellular junctions on the micro-roll scaffold at DIV 8. Images are representative of three independent micro-roll devices. Scale bar: 200  $\mu\text{m}$ .

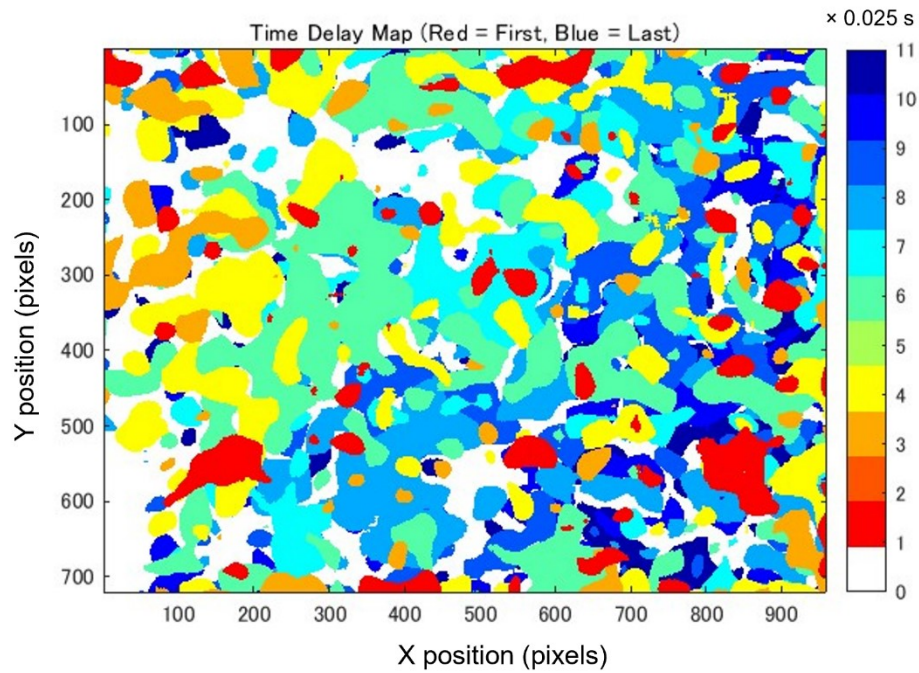

**Figure S6.** Spatial map of activation delays derived from  $\text{Ca}^{2+}$  imaging recordings of HL-1 cells at DIV 11 (Movie S4). Each pixel represents the relative activation time of the  $\text{Ca}^{2+}$  transient, with colour indicating the temporal delay (red = earliest activation, blue = latest activation). The colour scale is expressed in increments of 0.025 s. While the map reveals spatial heterogeneity in activation timing across the recorded field, a clear trend can be identified which propagates from top left to bottom right. Based on this observation, we estimate a propagation velocity of around 7  $\text{mm s}^{-1}$ .

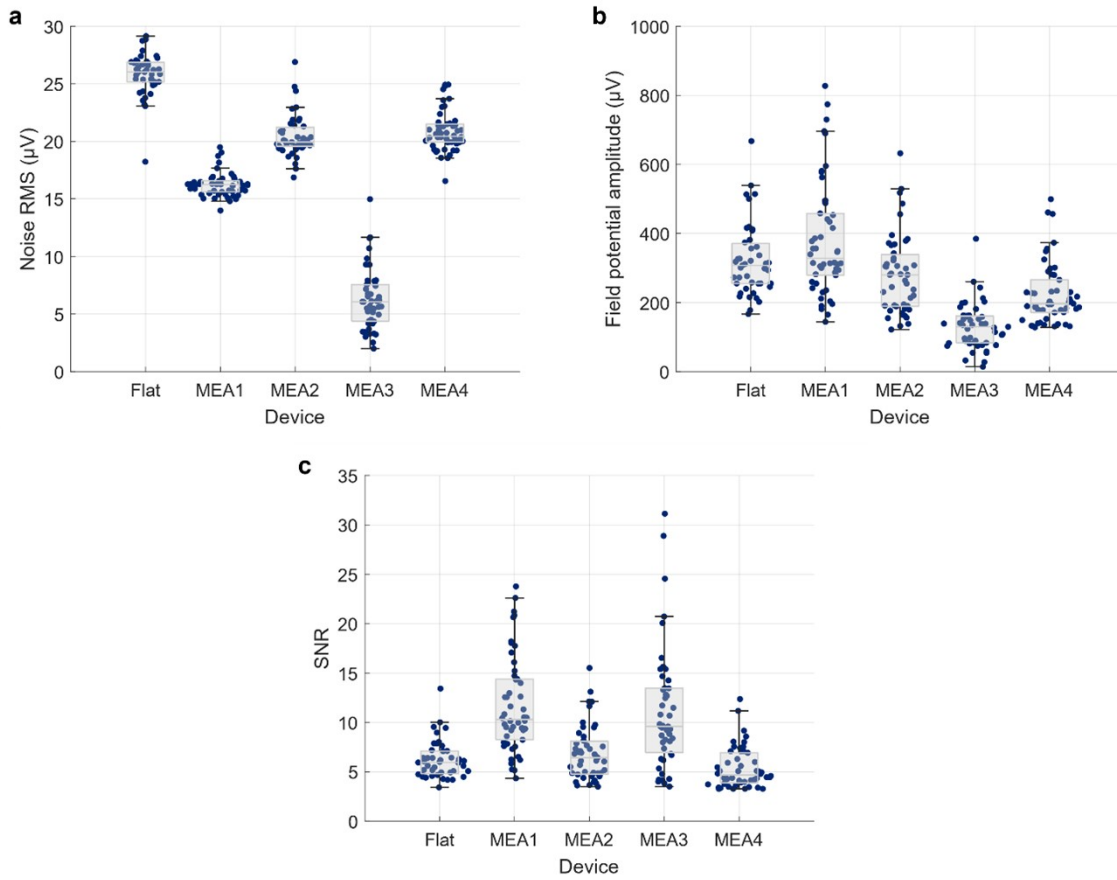

**Figure S7.** Within-array variability of electro-performance metrics. (a) Noise RMS ( $V_{RMS}$ ), (b) Peak-to-peak field potential amplitude ( $V_{pp}$ ) and (c) SNR distributions calculated from all channels across 4 graphene micro-roll MEAs at DIV 6 ( $n = 183$  channels) as well as side-by-side comparison with a planar graphene MEA ( $n = 42$  channels).

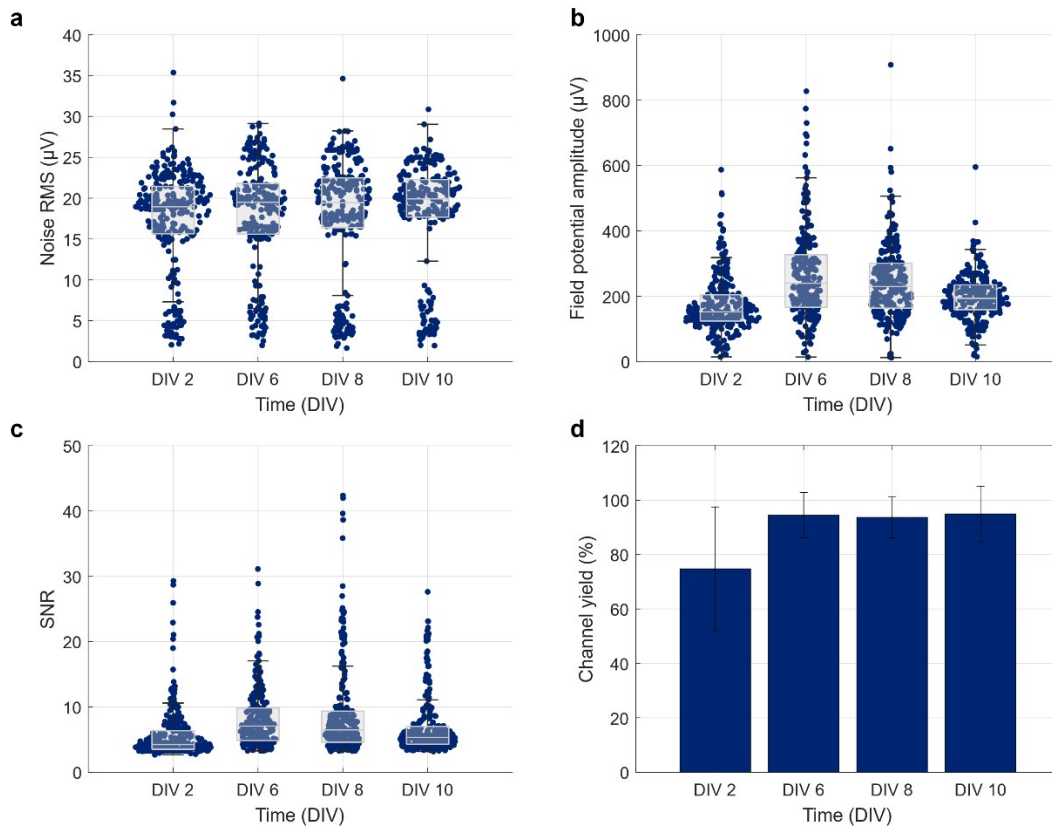

**Figure S8.** Stability over time of electro-performance metrics. (a) Noise RMS, (b) Peak-to-peak field potential amplitude, (c) SNR distributions and (d) biologically active channel yield calculated from all channels across 4 graphene micro-roll MEAs for 8 days. A channel was considered active if it featured an  $\text{SNR} \geq 3.5$ .

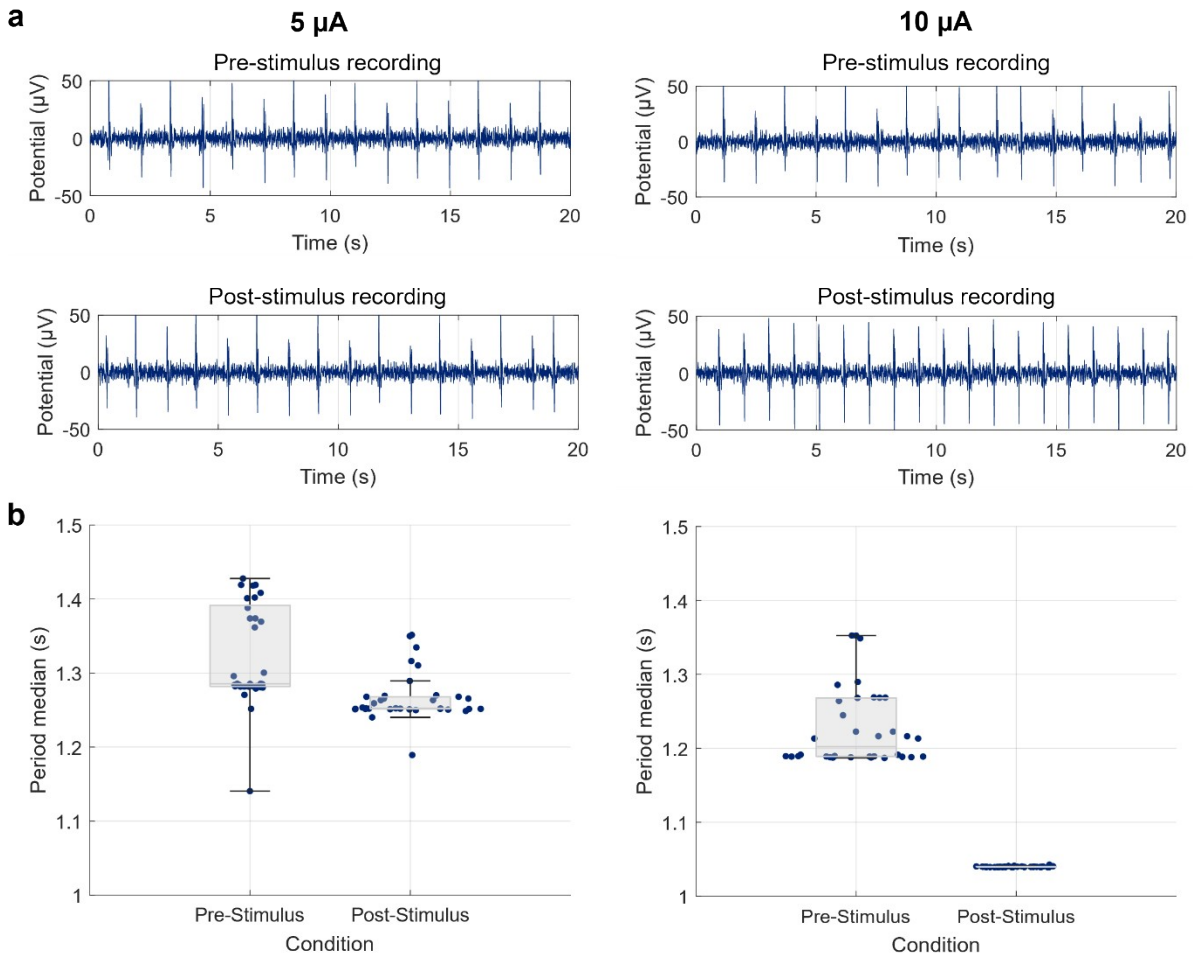

**Figure S9.** Amplitude dependent response of HL-1 cells induced by 1 Hz electrical stimulation. (a) Representative recordings from a single channel 20 s before and 20 s after 10 biphasic stimuli. Stimulation at 10  $\mu\text{A}$  resulted in a transient synchronization of the beating frequency to approximately 1 Hz following the stimulation train, whereas stimulation at 5  $\mu\text{A}$  did not induce a notable change in beating rate. (b) Swarm plot of the median beating period of all active electrodes of the device before and after stimulation, indicating a stimulation-amplitude-dependent modulation of network activity.

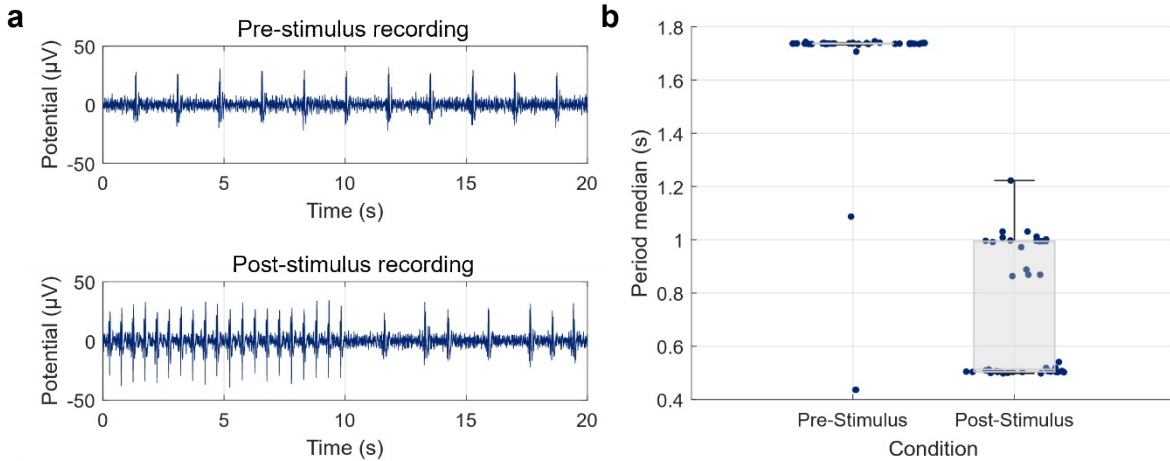

**Figure S10.** Entrainment-like response to 2 Hz electrical stimulation. (a) Representative recording 20 s before and 20 s after application of a train of 10 biphasic current pulses (2 Hz, 60  $\mu$ A). While stimulus-evoked responses during the pulse are obscured by the stimulation artifact, many electrodes exhibited a transient increase in beating frequency to approximately 2 Hz following the stimulation train. (b) Swarm plot of the median beating period across all active electrodes of the device before and after stimulation. While the majority of channels followed the 2 Hz stimulation frequency, some electrodes synchronised at approximately 1 Hz, indicating partial entrainment of the network activity.

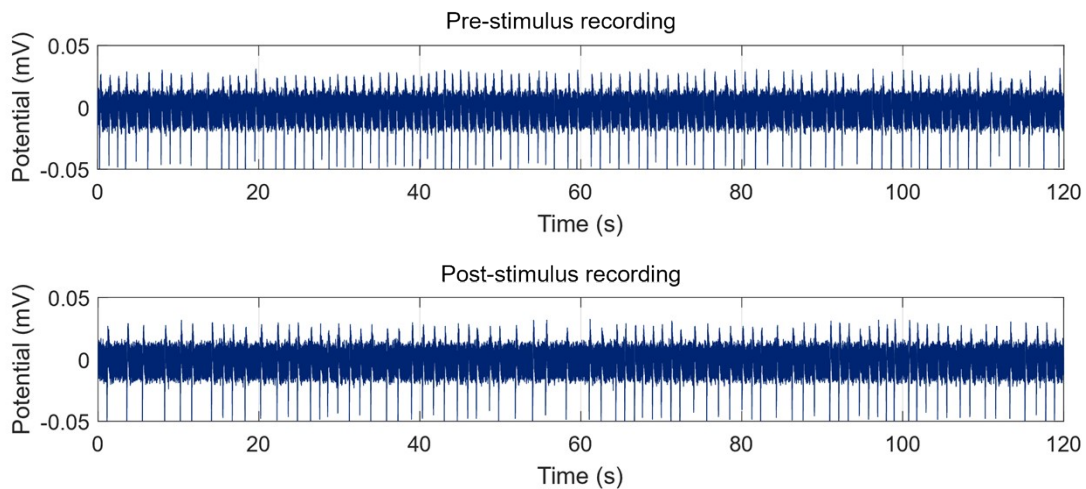

**Figure S11.** Raw spontaneous electrical activity of primary cardiomyocytes before and after applying a 2-s periodic stimulus corresponding to the average period analysis shown in Figure 5a.

ATTACHED CONTENT

**Supplementary movie 1.** Primary cardiomyocyte culture beating around graphene scaffolds at DIV 2. (MP4)

**Supplementary movie 2.** 3D z-stack animation of the immunostained low cell density graphene micro-roll in Figure 3b (middle). (MP4)

**Supplementary movie 3.** 3D z-stack animation of the immunostained high cell density graphene micro-roll in Figure 3b (right). (MP4)

**Supplementary movie 4.** Exemplary  $\text{Ca}^{2+}$  imaging recording of HL-1 cells at DIV 11. (MP4)
